# Supplementary material for: Prognostic relevance of topoisomerase II α and minichromosome maintenance protein 6 expression in colorectal cancer
Source: BMC Cancer. 2019 May 9;19:429. doi: 10.1186/s12885-019-5631-3 (PMC6507179; doi:10.1186/s12885-019-5631-3)
Supplement: Supplementary file 5 — Table S2. Coherence of minichromosome maintenance protein 6 IHC expression to clinical and histological criteria. (XLSX 9 kb) [file 12885_2019_5631_MOESM5_ESM.xlsx]

## Sheet: Sheet1
Supplementary table S2. Coherence of minichromosome maintenance protein 6 IHC expression to clinical and histological criteria
	N	mean	median	range	p
age (years)
< 65	283	83.5	86.0	47.2 – 96.6	0.470
≥65	286	82.2	85.6	27.6 – 97.0
tumor site
right colon	164	81.6	84.6	27.6 – 97.0	0.096
left colon + rectum	398	83.2	86.6	27.8 – 96.8
UICC
I + II	274	84.8	86.6	27.6 – 97.0	0.012 (I+II vs III)
III	186	82.1	85.5	39.6 – 96.8	0.019 (III vs IV)
IV	104	78.9	82.3	41.6 – 95.2	<0.001 (VI vs I+II)
histological grading
I	9	78.8	76.4	62.2 – 88.4	0.005 (I vs III)
II	465	83.3	86.0	27.6 – 96.8	0.141 (I vs II)
III	94	80.9	84.7	41.6 – 97.0	0.032 (III vs II)
histology
adeno carcinoma	493	82.9	86.0	27.6 – 96.8	0.631 (Ad. vs Muc.)
mucinous carcinoma	60	84.4	86.2	59.0 – 95.0	0.306 (Muc. vs Si.)
signet-ring cell carcinoma	7	74.2	82.6	41.6 – 97.0	0.396 (Si. vs Ad.)
resection margin
R0	526	83.7	86.2	27.6 – 97.0	<0.001
R1 + R2	30	72.5	76.2	41.6 – 91.0
All P values in bold, are regarded as statistically significant. Mean, median and range are stated as percentages (%) of IHC expression rates. Abbreviations: UICC – Union internationale contre le cancer.
